# Supplementary figures and images for: A balance between NF-Y and p53 governs the pro- and anti-apoptotic transcriptional response
Source: PubMed Central journal article supplement — Nucleic Acids Res. 2008 Jan 10;36(5):1415–28. doi: 10.1093/nar/gkm1046 (PMC2275158; doi:10.1093/nar/gkm1046), 2008-01-10

**A**

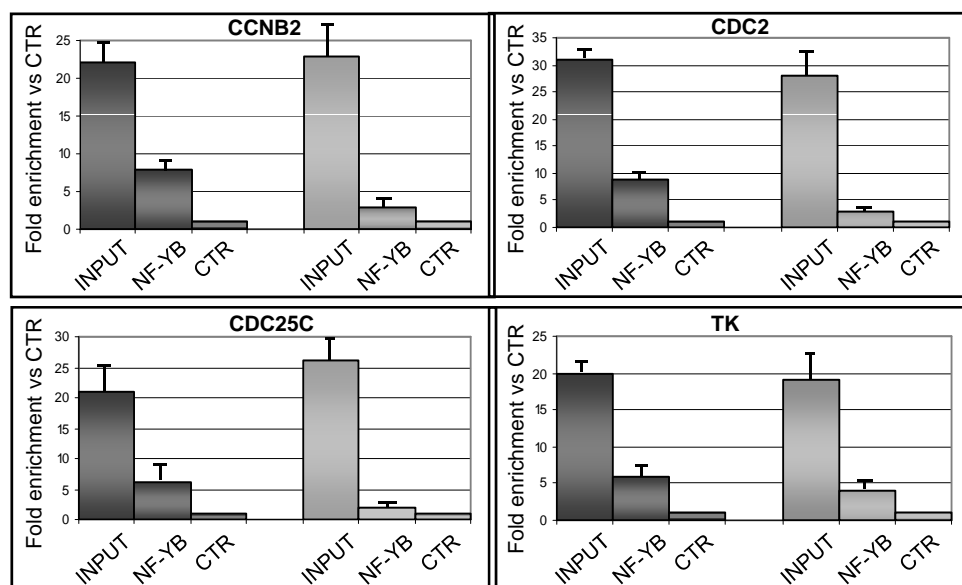

**B**

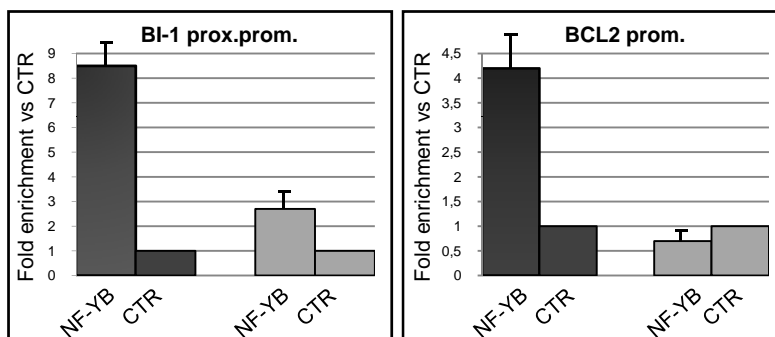

Supplement: nar_gkm1046_2.pdf [file nar_gkm1046_2.pdf]

**A**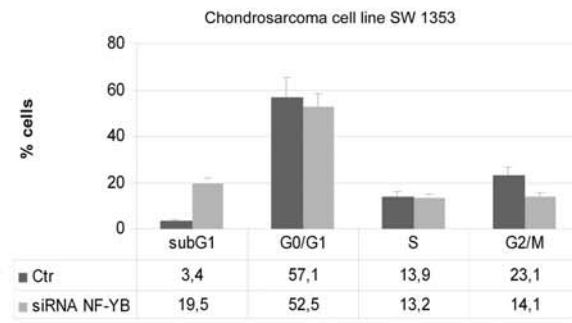**B**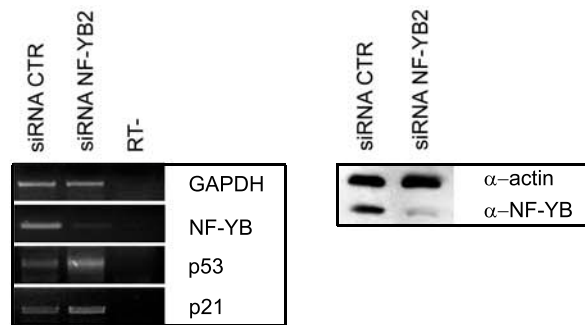

Supplement: nar_gkm1046_3.pdf [file nar_gkm1046_3.pdf]
